# Supplementary material for: Structural and electronic properties for Be-doped Ptn (n = 1–12) clusters obtained by DFT calculations
Source: Royal Society of Chemistry journal article supplement (doi:10.1039/d1cp05410d), 2022-01-01
Supplement: d1cp05410d1.pdf [file d1cp05410d1.pdf]

## Supporting Information: ‘Structural and electronic properties for Be-doped Pt<sub>n</sub> (n = 1 – 12) clusters obtained by DFT calculations’

Peter L. Rodríguez-Kessler,<sup>\*a</sup> Adán R. Rodríguez-Domínguez,<sup>\*b</sup> Pedro Alonso-Dávila,<sup>c</sup> Pedro Navarro-Santos,<sup>d</sup> and Alvaro Muñoz-Castro<sup>\*a</sup>

---

<sup>a</sup> Grupo de Química Inorgánica y Materiales Moleculares, Facultad de Ingeniería, Universidad Autónoma de Chile, El Llano Subercaseaux 2810, Santiago, Chile. E-mail: rodriguezkessler.p@gmail.com, alvaro.munoz@uautonoma.cl

<sup>b</sup> Instituto de Física, Universidad Autónoma de San Luis Potosí, San Luis Potosí 78000, México, E-mail: adnrdz@ifisica.uaslp.mx

<sup>c</sup> Facultad de Ciencias Químicas, Universidad Autónoma de San Luis Potosí, San Luis Potosí 78000, México

<sup>d</sup> CONACYT-Universidad Michoacana de San Nicolás de Hidalgo, Edif. B-1, Francisco J. Múgica, s/n, Morelia 58030, Michoacán, México

# 1 Formulas and Definitions for the Energetic Parameters

## 1.1 Binding energy and fragmentation energy

The stability of  $Pt_nBe$  clusters (with  $n = 1 - 12$ ) is investigated by calculating the binding energy per atom ( $E_B$ ), and fragmentation energy ( $E_f$ ), defined as

$$E_B[Pt_nBe] = \{E[Be] + nE[Pt] - E[Pt_nBe]\}/n, \quad (1)$$

$$E_f[Pt_nBe] = E[Pt_{n-1}Be] + \{E[Pt] + E[Be]\} - E[Pt_nBe], \quad (2)$$

where  $E[Be]$ ,  $E[Pt]$ , and  $E[Pt_nBe]$  are the total energies of the bare Be atom, the Pt atom, and the  $Pt_nBe$  doped cluster.

## 1.2 Ionization potential and electron affinity

The vertical ionization potential (vIP) and vertical electron affinity (vEA) are calculated as follows:

$$vIP = E[Pt_nBe^+] - E[Pt_nBe], \quad (3)$$

$$vEA = E[Pt_nBe] - E[Pt_nBe^-]. \quad (4)$$

## 1.3 Chemical Hardness

The chemical hardness is approximated as

$$\eta \approx \frac{1}{2}(vIP - vEA). \quad (5)$$

## 1.4 The d-band center

The position of the d-band center  $\epsilon_d$  is calculated by the following expression:

$$\epsilon_d = \frac{\sum_i \epsilon_i * d(\epsilon_i)}{\sum_i d(\epsilon_i)}, \quad (6)$$

since the clusters studied in this work have a magnetic character, we have included the d-band center ( $\epsilon_d$ ) of the clusters for the majority ( $\epsilon_d \uparrow$ ) and minority spin states ( $\epsilon_d \downarrow$ ), respectively.

# 2 Cartesian coordinates

## 2.1 The lowest energy structures of $Pt_nBe$ ( $n = 3 - 12$ ) clusters calculated using the G09 program and the PW91/cc-pVDZ-PP approach.

### Pt<sub>3</sub>Be geometry:

|    |              |              |              |
|----|--------------|--------------|--------------|
| Be | -0.000001000 | -1.234163000 | 0.000258000  |
| Pt | 1.925534000  | -0.517061000 | -0.000010000 |
| Pt | -1.925534000 | -0.517061000 | -0.000010000 |
| Pt | 0.000000000  | 1.097412000  | 0.000006000  |

### Pt<sub>4</sub>Be geometry:

|    |              |              |              |
|----|--------------|--------------|--------------|
| Be | -0.001054000 | 1.241594000  | 0.000000000  |
| Pt | 1.306255000  | -0.553340000 | 0.000000000  |
| Pt | -0.001054000 | 0.523493000  | 2.031748000  |
| Pt | -0.001054000 | 0.523493000  | -2.031748000 |
| Pt | -1.304092000 | -0.557317000 | 0.000000000  |

### Pt<sub>5</sub>Be geometry:

|    |              |              |              |
|----|--------------|--------------|--------------|
| Be | 0.084593000  | -0.000123000 | -1.032906000 |
| Pt | -0.637818000 | -1.330849000 | 0.747918000  |

|    |              |              |              |
|----|--------------|--------------|--------------|
| Pt | -0.638505000 | 1.330982000  | 0.747660000  |
| Pt | 1.692327000  | -1.300584000 | -0.274389000 |
| Pt | -2.112049000 | -0.000531000 | -0.893733000 |
| Pt | 1.691708000  | 1.300988000  | -0.274486000 |

**Pt<sub>6</sub>Be geometry:**

|    |              |              |              |
|----|--------------|--------------|--------------|
| Be | -0.505396000 | 0.000092000  | -1.157669000 |
| Pt | 0.694622000  | -1.710450000 | -0.619674000 |
| Pt | -1.963340000 | 1.305026000  | -0.065373000 |
| Pt | -1.963404000 | -1.304930000 | -0.065301000 |
| Pt | 0.071963000  | 0.000000000  | 1.234397000  |
| Pt | 0.694851000  | 1.710469000  | -0.619593000 |
| Pt | 2.491226000  | -0.000119000 | 0.194911000  |

**Pt<sub>7</sub>Be geometry:**

|    |              |              |              |
|----|--------------|--------------|--------------|
| Be | -0.952840000 | 0.000038000  | -1.114097000 |
| Pt | 0.719743000  | 0.000086000  | 1.510027000  |
| Pt | 0.815761000  | -1.354149000 | -0.688753000 |
| Pt | 2.909226000  | -0.000193000 | 0.007710000  |
| Pt | -1.678156000 | 2.013525000  | -0.546757000 |
| Pt | 0.816011000  | 1.354048000  | -0.688930000 |
| Pt | -1.678459000 | -2.013391000 | -0.546778000 |
| Pt | -1.855263000 | 0.000074000  | 1.010615000  |

**Pt<sub>8</sub>Be geometry:**

|    |              |              |              |
|----|--------------|--------------|--------------|
| Be | 0.915059000  | 0.884257000  | 0.874227000  |
| Pt | -0.543521000 | -0.902424000 | 1.406716000  |
| Pt | -2.765039000 | -0.853898000 | -0.027539000 |
| Pt | 0.591785000  | 2.964225000  | 0.207579000  |
| Pt | 0.519750000  | 0.896374000  | -1.350984000 |
| Pt | -1.407011000 | 1.309265000  | 0.284770000  |
| Pt | 2.046026000  | -1.117981000 | -1.015892000 |
| Pt | -0.513243000 | -1.479847000 | -1.101039000 |
| Pt | 2.024326000  | -0.861061000 | 1.551557000  |

**Pt<sub>9</sub>Be geometry:**

|    |              |              |              |
|----|--------------|--------------|--------------|
| Be | 0.761679000  | 1.179710000  | 0.000000000  |
| Pt | 2.072611000  | -0.475831000 | 0.000000000  |
| Pt | -0.283427000 | -1.156861000 | 1.360371000  |
| Pt | -0.283427000 | -1.156861000 | -1.360371000 |
| Pt | -2.416626000 | -1.063145000 | 0.000000000  |
| Pt | 1.769589000  | -0.198389000 | -2.541636000 |
| Pt | 1.769589000  | -0.198389000 | 2.541636000  |
| Pt | -0.283427000 | 1.332218000  | -1.827853000 |
| Pt | -0.283427000 | 1.332218000  | 1.827853000  |
| Pt | -2.100518000 | 1.524540000  | 0.000000000  |

**Pt<sub>10</sub>Be geometry:**

|    |              |              |              |
|----|--------------|--------------|--------------|
| Be | -0.353038000 | 0.754351000  | 1.396679000  |
| Pt | 2.429198000  | 0.049364000  | -0.149070000 |
| Pt | 1.390201000  | -0.907221000 | -2.308712000 |

|    |              |              |              |
|----|--------------|--------------|--------------|
| Pt | -0.354155000 | -2.168297000 | -0.839838000 |
| Pt | 0.667371000  | -1.151599000 | 1.225088000  |
| Pt | 1.789803000  | 0.999174000  | 2.259803000  |
| Pt | 0.697407000  | 1.908605000  | -0.088590000 |
| Pt | -1.795964000 | -2.022125000 | 1.319067000  |
| Pt | -0.757287000 | 0.261932000  | -1.377666000 |
| Pt | -2.326580000 | 0.406997000  | 0.607749000  |
| Pt | -1.721891000 | 2.584484000  | -0.719456000 |

**Pt<sub>11</sub>Be geometry:**

|    |              |              |              |
|----|--------------|--------------|--------------|
| Be | 0.036771000  | 0.144637000  | 0.000000000  |
| Pt | -2.358484000 | -1.951366000 | 0.000000000  |
| Pt | 0.066503000  | -1.710036000 | 1.295600000  |
| Pt | 1.695516000  | 0.314410000  | 1.464270000  |
| Pt | -1.722643000 | 0.206236000  | 1.389666000  |
| Pt | 2.500097000  | -1.724504000 | 0.000000000  |
| Pt | -0.106430000 | 1.867858000  | 2.518570000  |
| Pt | 0.066503000  | -1.710036000 | -1.295600000 |
| Pt | -1.722643000 | 0.206236000  | -1.389666000 |
| Pt | -0.009391000 | 2.311515000  | 0.000000000  |
| Pt | 1.695516000  | 0.314410000  | -1.464270000 |
| Pt | -0.106430000 | 1.867858000  | -2.518570000 |

**Pt<sub>12</sub>Be geometry:**

|    |              |              |              |
|----|--------------|--------------|--------------|
| Be | 0.143971000  | -1.187226000 | 0.874013000  |
| Pt | -3.076122000 | -0.565066000 | -0.894169000 |
| Pt | -1.566148000 | -2.573849000 | 0.073415000  |
| Pt | -1.743486000 | 1.642901000  | -0.866473000 |
| Pt | 0.203903000  | 1.834507000  | 1.113399000  |
| Pt | -1.744135000 | -0.156883000 | 1.324798000  |
| Pt | 0.148530000  | 0.203263000  | 3.052934000  |
| Pt | -0.399216000 | -0.442768000 | -1.320559000 |
| Pt | 0.355242000  | 3.076333000  | -1.093398000 |
| Pt | 1.718380000  | 0.918858000  | -1.165294000 |
| Pt | 0.934885000  | -2.502171000 | -0.738239000 |
| Pt | 2.025992000  | -0.202626000 | 1.297113000  |
| Pt | 3.134791000  | -1.171616000 | -0.828349000 |
